# Supplementary material
Source: PubMed Central journal article supplement (PMC7189277)
Supplement: advancesADV2019000425-suppl1.pdf [file advancesADV2019000425-suppl1.pdf]

## Supplementary Information

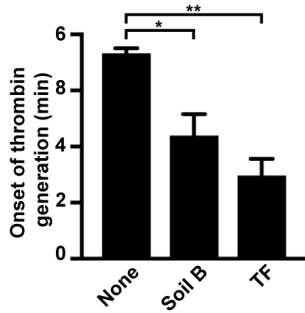

**Figure S1. Soils accelerate clotting in mouse plasma *in vitro*.**

The time until onset of thrombin was generated in mouse plasma in the presence or absence of soil.  $n = 5$ . \*  $p < 0.01$ , \*\*  $p < 0.001$ . Error bars represent SEM.

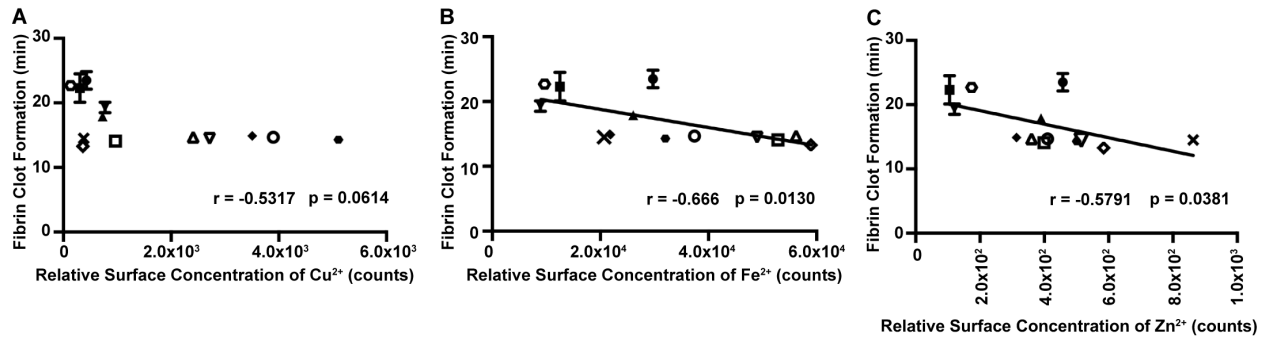

**Figure S2. Clot times were moderately correlated with the concentration of transition elements at the soil surface.**

(A-C) Elemental composition of soil surfaces was analyzed by TOF-SIMS for Cu<sup>2+</sup> (A), Fe<sup>2+</sup> (B) and Zn<sup>2+</sup> (C). A best fit line was drawn for significantly correlated observation. Clot times were  $n = 5$  for all panels.
